# Supplementary material
Source: HighWire-hosted journal article supplement (https://erj.ersjournals.com/content/58/1/2101328)
Supplement: inline-supplementary-material-1 [file inline-supplementary-material-1.pdf]

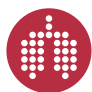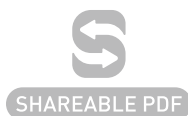

## Author reply: Do Tunisians have a European ancestry?

Sanja Stanojevic<sup>1</sup>, on behalf of the study authors: Graham L. Hall<sup>2,3</sup>, Nicole Filipow<sup>1</sup>, Gregg Ruppel<sup>4</sup>, Tolu Okitika<sup>2</sup>, Bruce Thompson<sup>5</sup>, Jane Kirkby<sup>6</sup>, Irene Steenbruggen<sup>7</sup> and Brendan G. Cooper<sup>8</sup>

<sup>1</sup>Dept of Community Health and Epidemiology, The Hospital for Sick Children, Toronto, ON, Canada. <sup>2</sup>Children's Lung Health, Wal-yan Respiratory Research Centre, Telethon Kids Institute, Perth, Australia. <sup>3</sup>School of Physiotherapy and Exercise Science, Curtin University, Perth, Australia. <sup>4</sup>Pulmonary, Critical Care and Sleep Medicine, Saint Louis University School of Medicine, St Louis, MO, USA. <sup>5</sup>School of Health Sciences, Swinburne University of Technology, Melbourne, Australia. <sup>6</sup>Respiratory Medicine, Sheffield Children's Hospital NHS Foundation Trust, Sheffield, UK. <sup>7</sup>Pulmonary Laboratory, Isala Klinieken, Zwolle, The Netherlands. <sup>8</sup>Lung Function and Sleep, University Hospital Birmingham and Institute of Clinical Sciences, University of Birmingham, Birmingham, UK.

Sanja Stanojevic ([sanja.stanojevic@dal.ca](mailto:sanja.stanojevic@dal.ca))

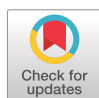

Shareable abstract (@ERSpublications)

**Until we have more comprehensive data from all regions in the world, we must be careful not to apply GLI equations indiscriminately** <https://bit.ly/3g1r9Q5>

**Cite this article as:** Stanojevic S, Hall onbehalfofthestudyauthors:GL, Filipow N, *et al.* Author reply: Do Tunisians have a European ancestry?. *Eur Respir J* 2021; 58: 2101328 [DOI: 10.1183/13993003.01328-2021].

This single-page version can be shared freely online.

Copyright ©The authors 2021. For reproduction rights and permissions contact [permissions@ersnet.org](mailto:permissions@ersnet.org)

Received: 10 May 2021  
Accepted: 11 May 2021

*Reply to H. Ben Saad:*

Copyright ©The authors 2021. For reproduction rights and permissions contact [permissions@ersnet.org](mailto:permissions@ersnet.org)
